# Supplementary material for: How RNA transcripts coordinate DNA recombination and repair
Source: PubMed Central journal article supplement (PMC5854605; doi:10.1038/s41467-018-03483-7), 2018-03-15
Supplement: 41467_2018_3483_MOESM1_ESM.pdf [file 41467_2018_3483_MOESM1_ESM.pdf]

## Supplementary Information

### How RNA Transcripts Coordinate DNA Recombination and Repair

McDevitt *et. al.*

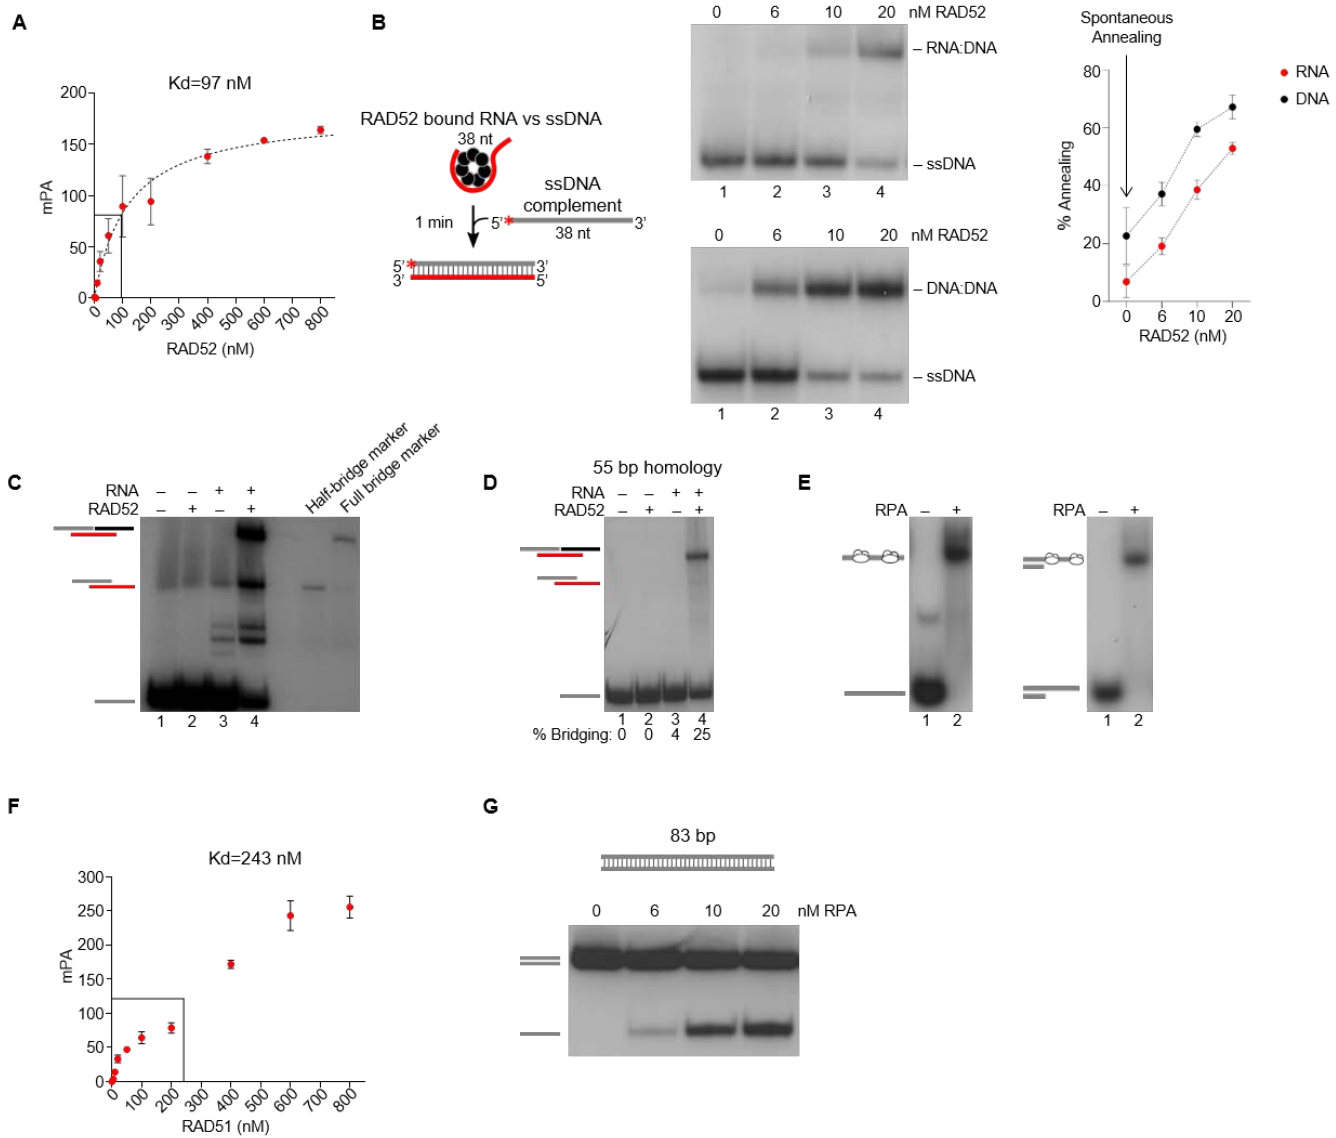

### Supplementary Fig. 1 Controls for RAD52-dependent RNA-DNA recombination.

(A) Plot showing RAD52 binding to fluorescein-conjugated RNA measured by fluorescence polarization. Data shown as average  $\pm$  SD, n=3. (B) Schematic of annealing assay (left). Non-denaturing gel showing RAD52 RNA-DNA annealing (top-middle) and RAD52 DNA-DNA annealing (bottom-middle). Plot showing % of RNA-DNA and DNA-DNA annealing (right). Data shown as average  $\pm$  SD, n=3. (C) Non-denaturing gel showing RAD52 RNA-DNA recombination in the presence of the indicated substrates with pre-annealed markers shown in right most lanes. (D) Non-denaturing gel showing RAD52-dependent RNA-DNA recombination (bridging) using nucleic acid substrates with different sequences than those used in Figure 2. (E) Electrophoresis mobility shift assay (EMSA) showing RPA binding to ssDNA (left) and pssDNA (right) substrates. (F) Plot showing RAD51 binding to fluorescein-conjugated RNA measured by fluorescence polarization. Data shown as average  $\pm$  SD, n=3. (G) Non-denaturing gel showing RPA unwinding of DNA. \* =  $^{32}$ P label.

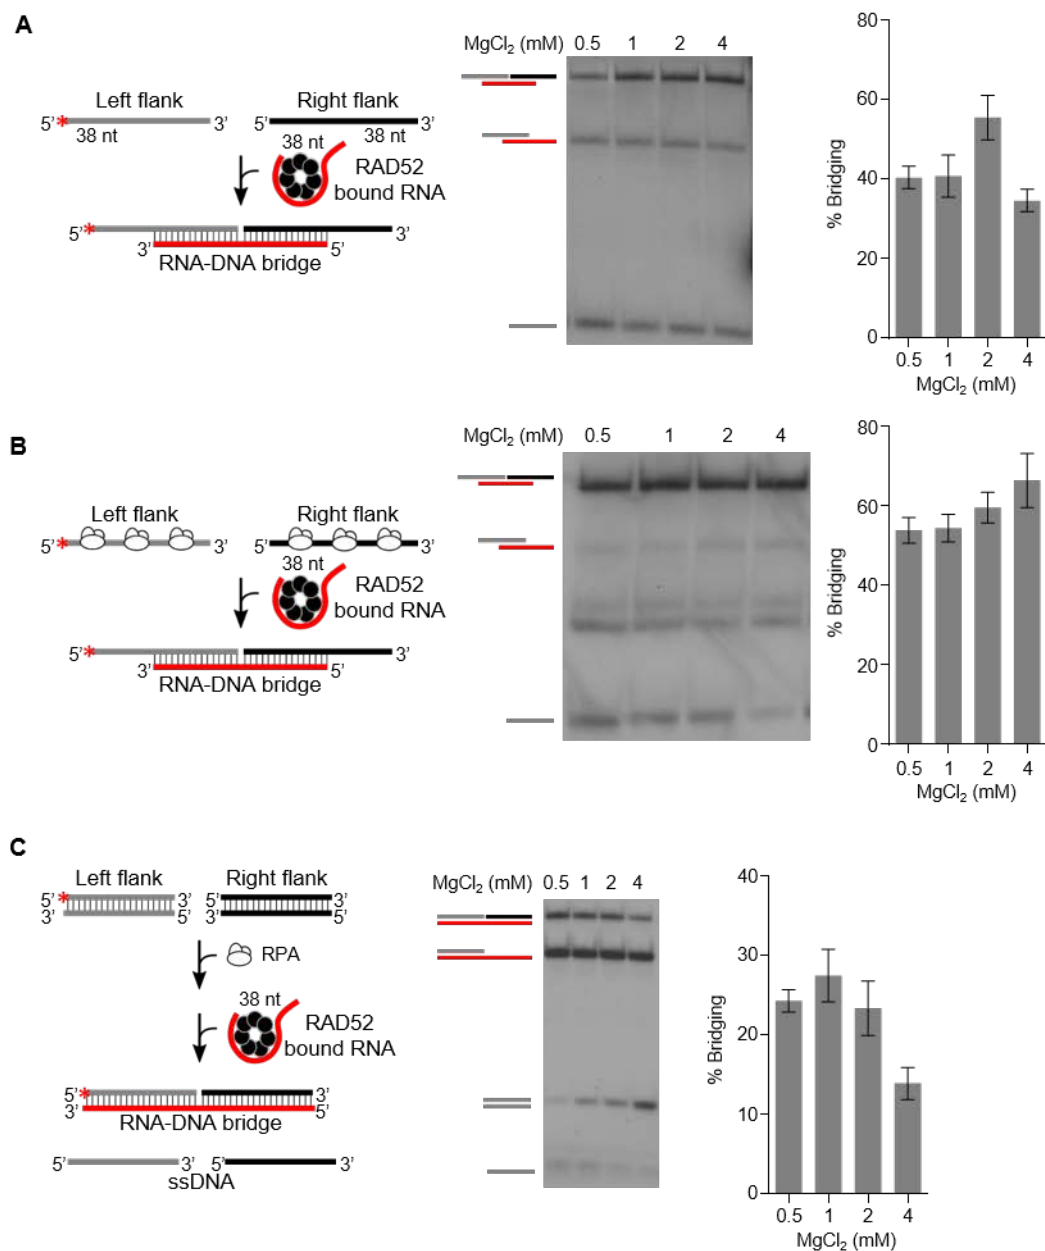

**Supplementary Fig. 2 RAD52-dependent RNA-DNA recombination occurs under physiological concentrations of magnesium.**

(A) Schematic of assay (left) Non-denaturing gel showing RAD52-dependent RNA-DNA recombination (bridging) of left and right homologous ssDNA flanks in the presence of the indicated amounts of MgCl<sub>2</sub> (middle). Graph showing % of RNA-DNA recombination (bridging) with the indicated amounts of MgCl<sub>2</sub> (right). Data shown as average  $\pm$  SD, n=3. (B) Schematic of assay (left) Non-denaturing gel showing RAD52-dependent RNA-DNA recombination (bridging) of left and right homologous ssDNA flanks pre-bound to RPA in the presence of the indicated amounts of MgCl<sub>2</sub> (middle). Graph showing % of RNA-DNA recombination (bridging) with the indicated amounts of MgCl<sub>2</sub> (right). Data shown as average  $\pm$  SD, n=3. (C) Schematic of assay (left) Non-denaturing gel

showing RAD52-dependent RNA-DNA recombination (bridging) of left and right homologous blunt-ended DNA flanks in the presence of the indicated amounts of MgCl<sub>2</sub> (middle). Graph showing % of RNA-DNA recombination (bridging) with the indicated amounts of MgCl<sub>2</sub> (right). Data shown as average  $\pm$  SD, n=3. \* = <sup>32</sup>P label.

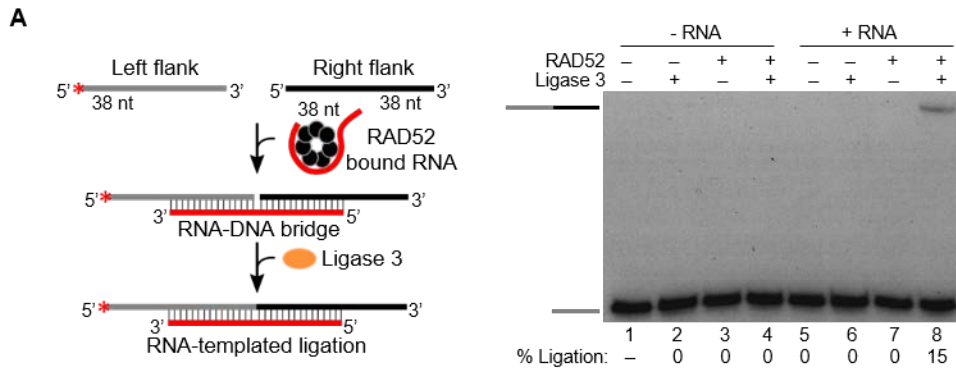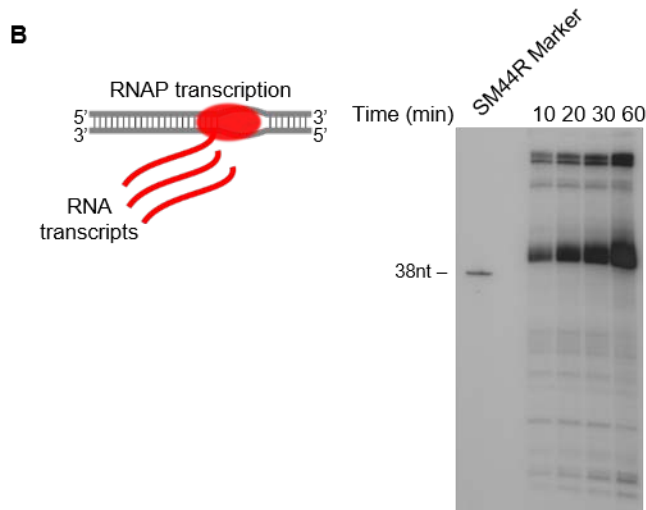

**Supplementary Fig. 3 Additional controls for RAD52-dependent RNA-DNA recombinational repair.**

(A) Schematic of assay (left). Denaturing gel showing RAD52 dependent RNA-DNA recombinational repair in the presence of the indicated proteins and RNA substrate (right). (B) Schematic of assay (left). Denaturing gel showing time course of transcription by T7 RNAP in the presence of [ $\alpha$ -<sup>32</sup>P]ATP (right). \* = <sup>32</sup>P label.

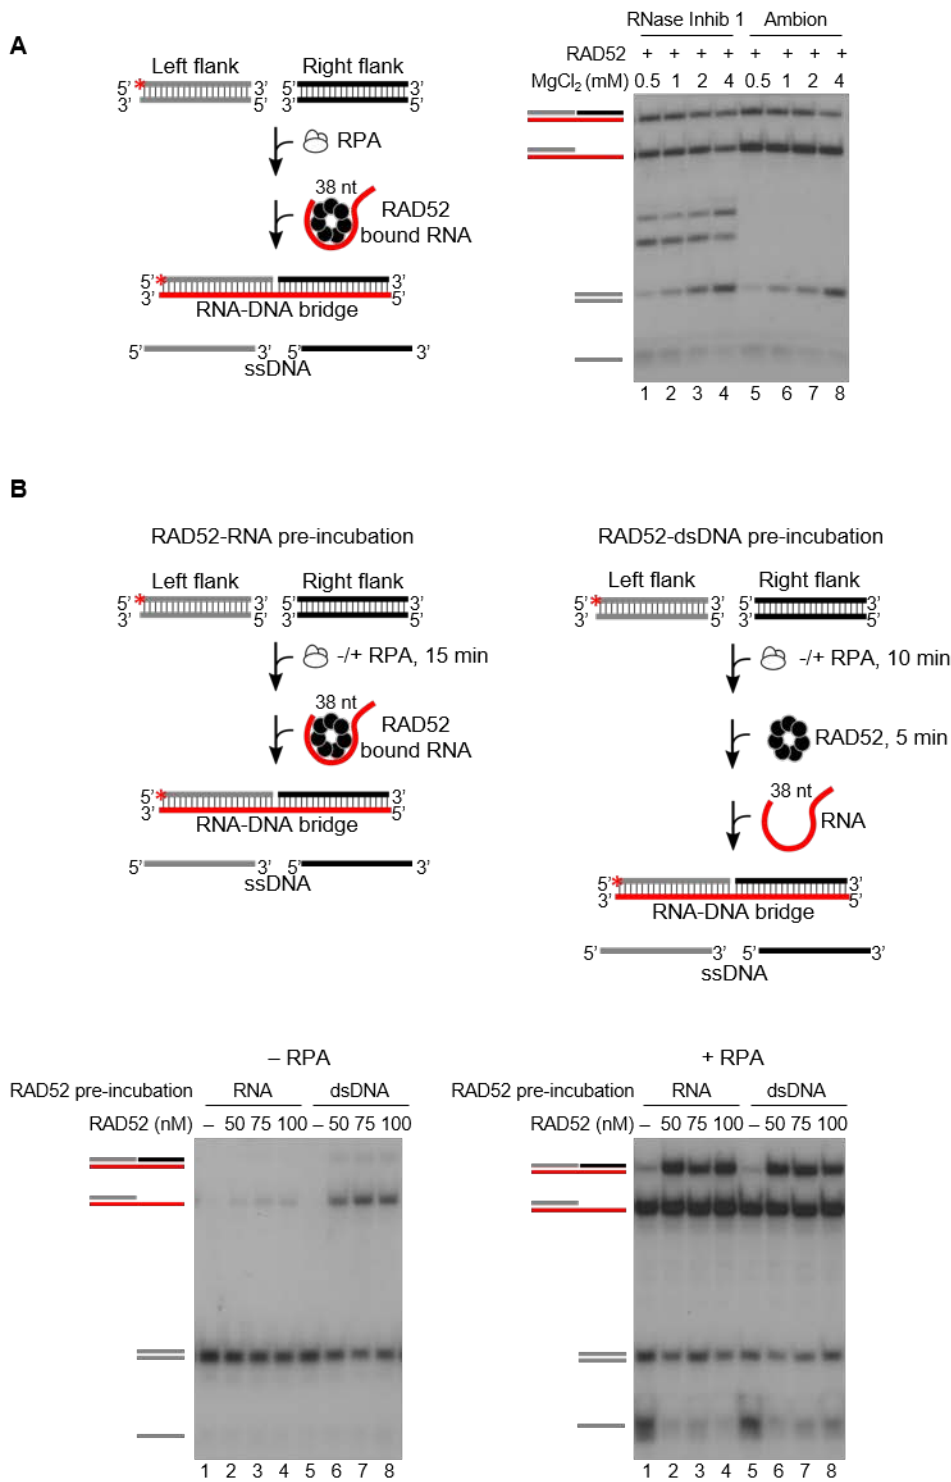

**Supplementary Fig. 4 Controls for RAD52-dependent RNA-DNA recombination of blunt-ended DNA.**

(A) Schematic of assay (left). Non-denaturing gel showing RAD52-dependent RNA-DNA recombination of blunt-ended DNA in the presence of the indicated RNase inhibitors (right). Disappearance of the intermediate molecular weight bands in lanes 5-8 indicates suppression of RNase contamination by the Ambion RNase inhibitor. (B) Schematic of assays employing either RAD52-RNA or RAD52-dsDNA pre-incubation steps in the

presence and absence of RPA (top). Non-denaturing gels showing RAD52-dependent RNA-DNA recombination employing the indicated pre-incubation steps in the presence (right panel) and absence (left panel) of RPA. Little or no difference in RNA-DNA recombination is observed in the presence of RPA (right panel). RAD52-dsDNA pre-incubation stimulates RNA-DNA half-bridge formation exclusively in the absence of RPA (left panel). These data are plotted as average  $\pm$  SD in Figure 4C, n=3. \* =  $^{32}$ P label.

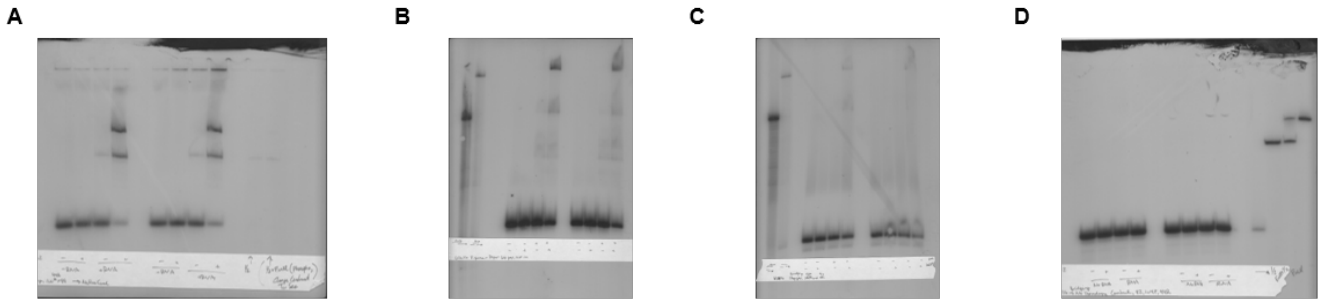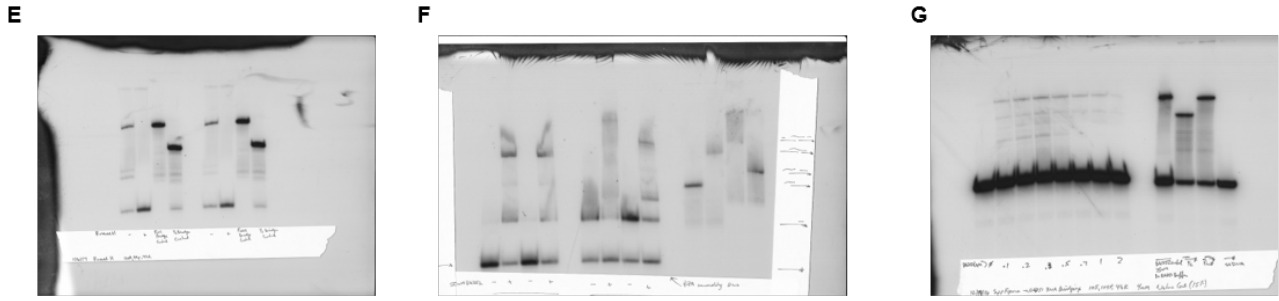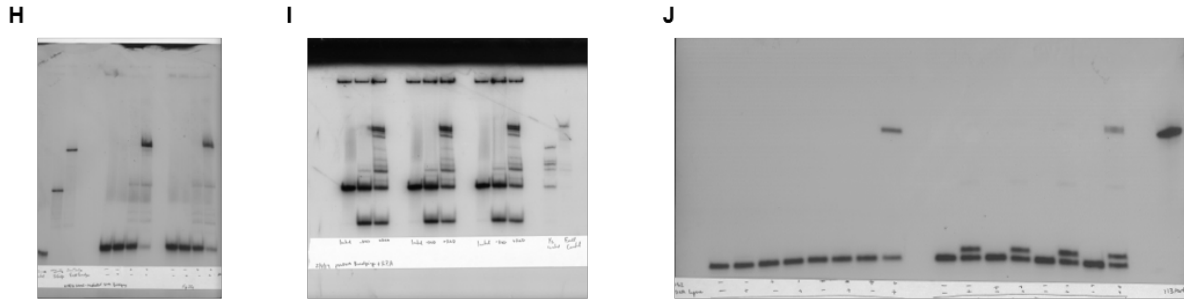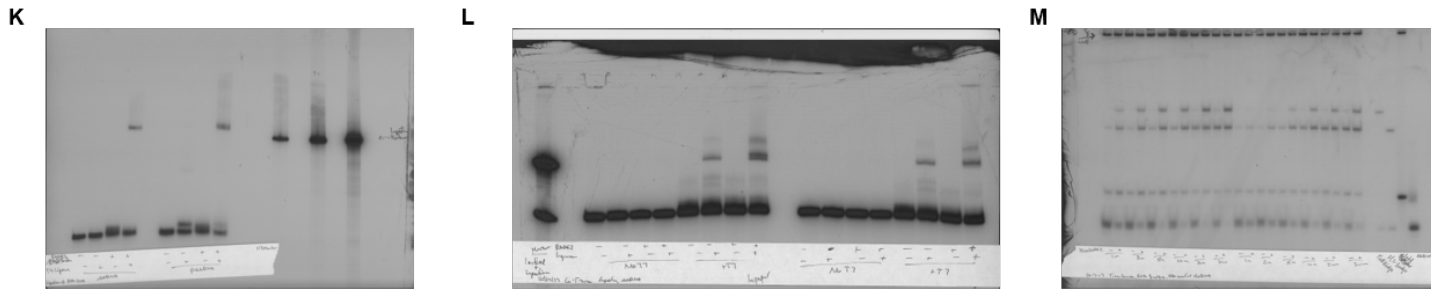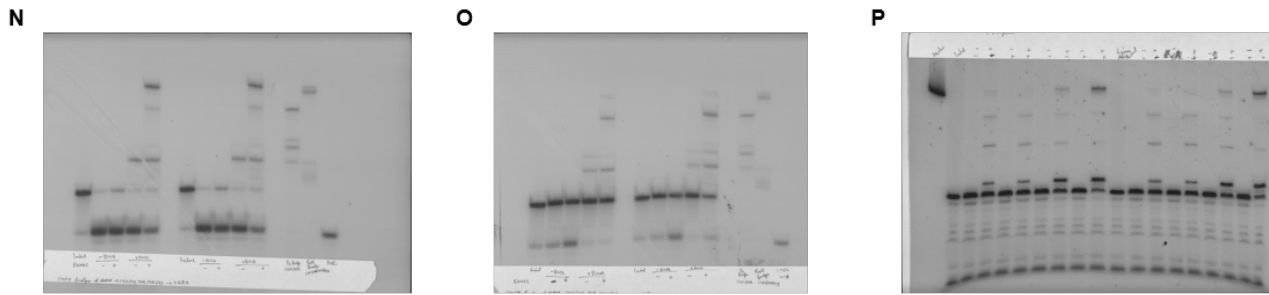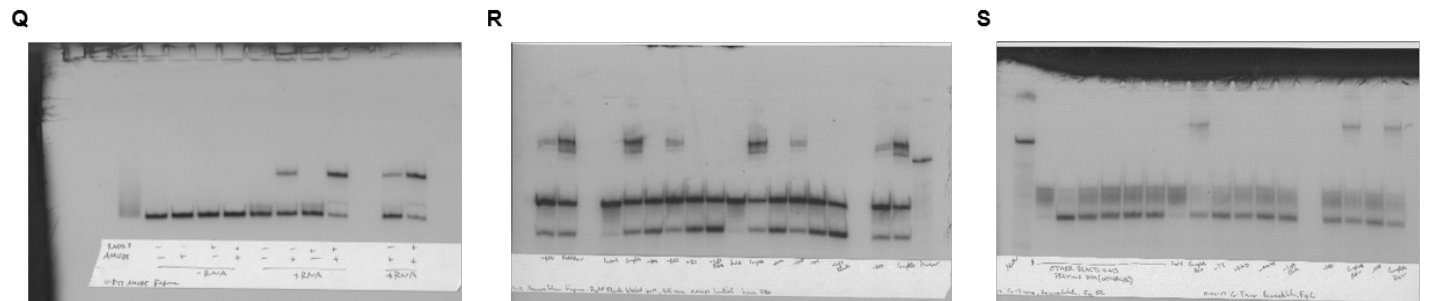

## Supplementary Fig. 5 Uncropped gel images from main text.

(A) Fig 2A, 0 bp gap (B) Fig 2A, 6 bp gap (C) Fig 2A, 12 bp gap (D) Fig 2A, no homology (E) Fig 2B (F) Fig 2D (G) Fig 2F (H) Fig 2G (I) Fig 2H (J) Fig 2A (K) Fig 3B (L) Fig 3C (M) Fig 4A (N) Fig 4B, left (O) Fig 4B, right (P) Fig 4D (Q) Fig 5A (R) Fig 5B (S) Fig 5C

## Supplementary Methods

**Fluorescence Polarization** Reactions were performed in 25 mM Tris-HCl pH 7.5, 1 mM DTT, 10 mM KCl, 0.01% NP-40, 0.1mg/ml BSA, 10% glycerol with 10 nM fluorescein-conjugated RNA (SM51R). Reactions containing RAD51 were supplemented with 2 mM MgCl<sub>2</sub>, 4 mM CaCl<sub>2</sub>, and 2 mM ATP. Reactions containing RAD52 were supplemented with 4 mM MgCl<sub>2</sub>. After the addition of RAD51 or RAD52, reactions were incubated for 30 minutes at room temperature, then fluorescence polarization was determined using a Clariostar (BMG Labtech) plate reader (Figs. 1A, 1F).

**RNA-DNA annealing** Reactions were performed in 25 mM Tris-HCl pH 7.5, 1 mM DTT, 10 mM NaCl, 0.01% NP-40, 0.5 mM MgCl<sub>2</sub>, 0.1 mg/ml BSA, 10% glycerol at 37° C. 30 nM RAD52 was pre-incubated with 4 nM RNA (SM44R) or ssDNA (SM44) for 5 min. Next, 4 nM 5'-<sup>32</sup>P-radiolabeled complementary ssDNA (SM44C) was added and annealing occurred for 1 min. Reactions were terminated by the addition 0.4 μM cold ssDNA. Finally, reactions were treated with 2 μl of stop buffer (5 mg/ml proteinase K, 100 mM Tris-HCl pH 7.5, 1.5% SDS, 100 mM EDTA) for 15 min. Reactions were resolved in 15% non-denaturing polyacrylamide gels and visualized by autoradiography (Fig 1B).

**RNA-dependent DNA recombination of ssDNA and pssDNA** Figs 1C, 1D: Reactions were performed in 20 μl volume of buffer A (25 mM Tris-HCl pH 7.5, 1 mM DTT, 10 mM NaCl, 0.01% NP-40, 0.1 mg/ml BSA, 10% glycerol) at 37° C. Reactions contained 0.5 mM MgCl<sub>2</sub>. 30 nM RAD52 was pre-incubated with 4 nM RNA (SM46R) for 5 min. Next, equimolar concentrations of indicated 5'-<sup>32</sup>P-radiolabeled 4 nM ssDNA (SM104P and SM105) were added. Reactions were terminated after 1 min or indicated times by the addition 0.4 μM cold ssDNA, then treated with 2 μl of stop buffer (5 mg/ml proteinase K, 100 mM Tris-HCl pH 7.5, 1.5% SDS, 100



mM EDTA) for 15 min. Nucleic acids were resolved in 15% non-denaturing polyacrylamide gels and visualized by autoradiography.

**RPA EMSA** In the case of RPA binding to ssDNA or pssDNA (Fig. 1E), 20 nM RPA was incubated with 8 nM ssDNA or pssDNA for 15 min in 25 mM Tris-HCl pH 7.5, 1 mM DTT, 10 mM NaCl, 0.01% NP-40, 0.5 mM MgCl<sub>2</sub>, 0.1 mg/ml BSA, 10% glycerol at 37° C. Reactions were resolved in 5% non-denaturing polyacrylamide gels and visualized by autoradiography. In the case of RPA unwinding of dsDNA (Fig. 1G), RPA was incubated with 83 bp dsDNA (SM132/SM133) for 15 min in 25 mM Tris-HCl pH 7.5, 1 mM DTT, 10 mM NaCl, 0.01% NP-40, 0.5 mM MgCl<sub>2</sub>, 0.1 mg/ml BSA, 10% glycerol at 37° C. Reactions were terminated by the addition 0.4 μM cold ssDNA and treated with 2 μl of stop buffer (5 mg/ml proteinase K, 100 mM Tris-HCl pH 7.5, 1.5% SDS, 100 mM EDTA) for 15 min. Reactions were resolved in 15% non-denaturing polyacrylamide gels and visualized by autoradiography.

**Magnesium titration during ssDNA and dsDNA bridging:** Figs 2A, 2B, 2C: Reactions were performed as described in the main text (See methods for main text Figs. 2A, 2D, 4A).

**RNA-DNA ligation involving human Ligase 3** RAD52-dependent RNA bridging reactions were performed in 20 μl of buffer A as described above (main text Fig. 2A), followed by ligation with 50 nM human ligase 3. During ligation, MgCl<sub>2</sub> was supplemented to 4 mM MgCl<sub>2</sub> (Fig. 3A) for 2 hr at 25 °C. Reactions were supplemented with 1 mM ATP during ligation. Reactions were terminated by the addition of stop buffer (45% formamide, 20 mM EDTA). Reactions were resolved in 12% denaturing (urea) polyacrylamide gels and visualized by autoradiography.

**In vitro transcription** Transcription was performed in 20 mM Tris-HCl pH 8.0, 1 mM DTT, 6 mM MgCl<sub>2</sub>, and 20 units RNase inhibitor (Ambion) for 1 hr. Reactions contained 50 nM T7 RNA polymerase and 50 nM transcription template (SM85/SM85C), 400 μM rGTP, rCTP, rUTP, and 100 μM rATP. Reactions were visualized by incorporation of [α-<sup>32</sup>P] rATP. Reactions were terminated by stop buffer (45% formamide, 20 mM EDTA), resolved in 20% denaturing (urea) polyacrylamide gels, and visualized by autoradiography.

**RNA-dependent DNA recombination of dsDNA** In the case of testing different RNase inhibitors (Fig. 4A), reactions were performed as described in the main text (see main text Fig. 4A) containing 2 mM MgCl<sub>2</sub> and 20 units RNase inhibitor (Ambion) or 20 units of RNase inhibitor I (Invitrogen SUPERase-In). In the case of testing RAD52 pre-incubation (Fig. 4B), see methods for main text Figure 4C.
